# Supplementary material for: Co-targeting EGFR and mTOR with gefitinib and everolimus in triple-negative breast cancer cells
Source: PubMed Central journal article supplement (PMC7156377; doi:10.1038/s41598-020-63310-2), 2020-04-14
Supplement: 41598_2020_63310_MOESM1_ESM.pdf [file 41598_2020_63310_MOESM1_ESM.pdf]

# Supplementary Information

## **Co-targeting EGFR and mTOR with gefitinib and everolimus in triple-negative breast cancer cells**

Abderrahim El Guerrab, Mahchid Bamdad, Yves-Jean Bignon, Frédérique Penault-Llorca and Corinne Aubel

Full-length Western blots are shown in the same order as they appear in the main manuscript.

**CAL-51**

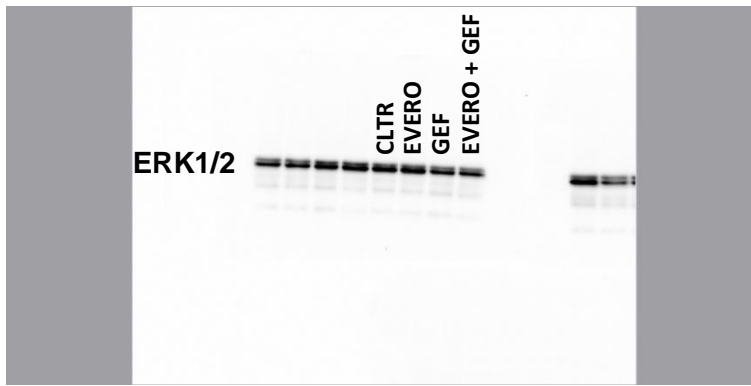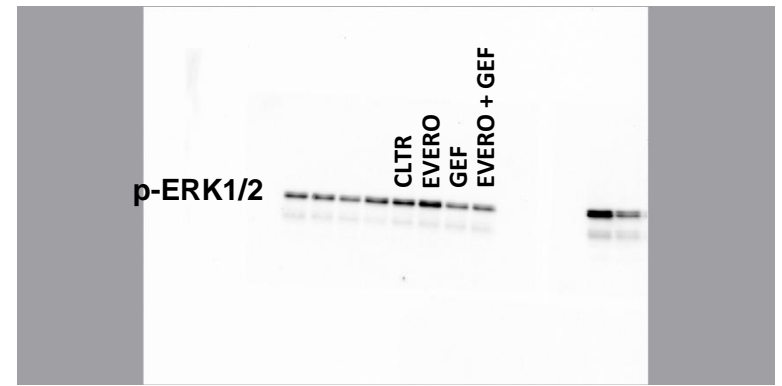

**HCC-1937**

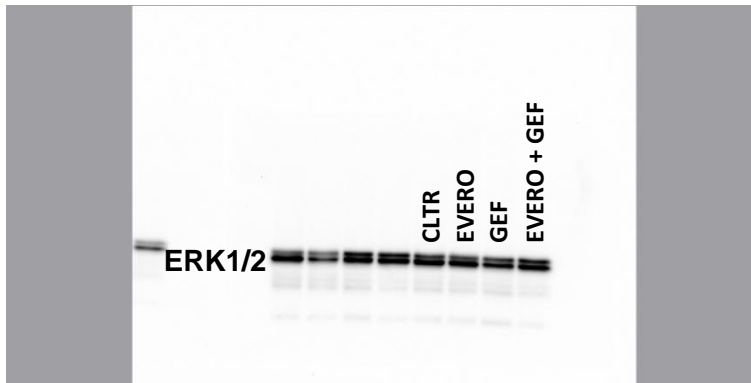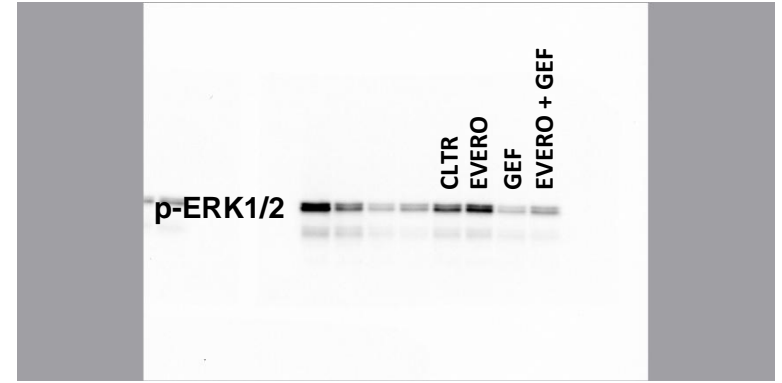

**SUM-1315**

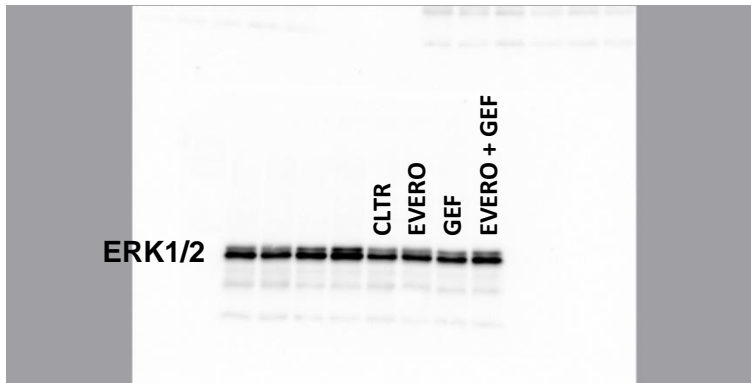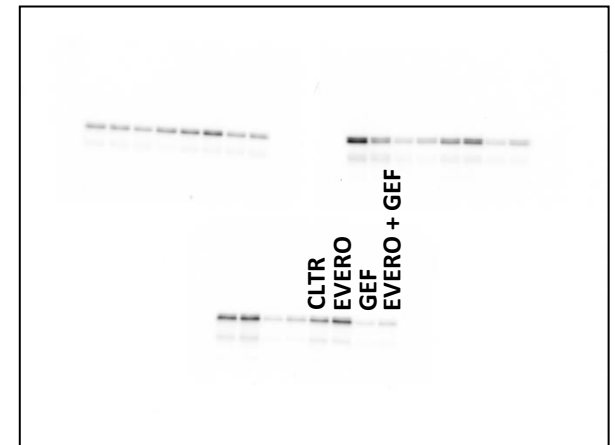

**Full-length blots – ERK and phospho-ERK – Figure 3**

**CAL-51**

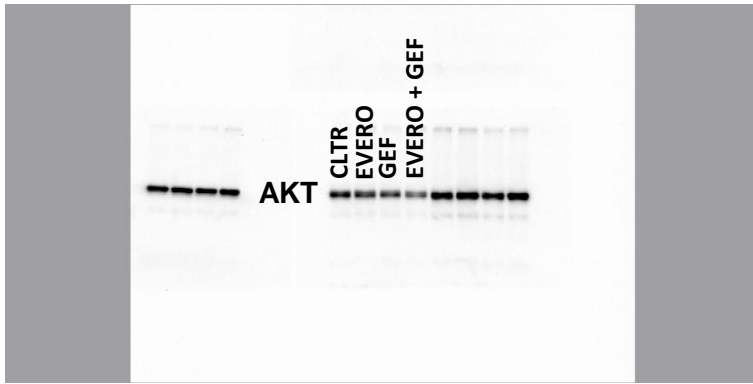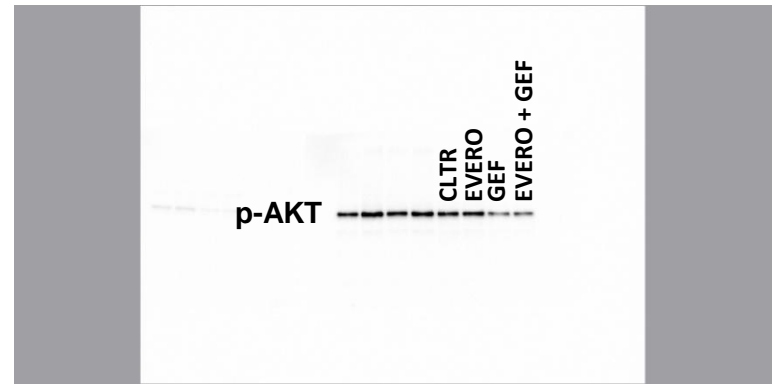

**HCC-1937**

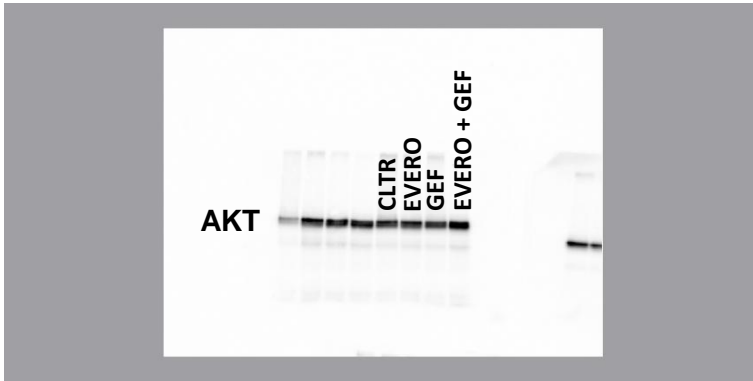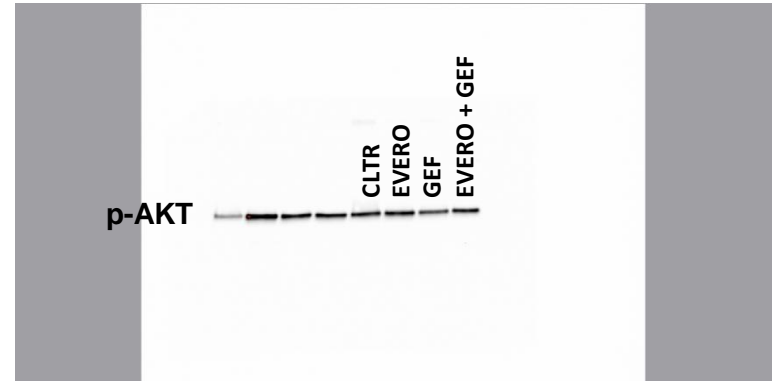

**SUM-1315**

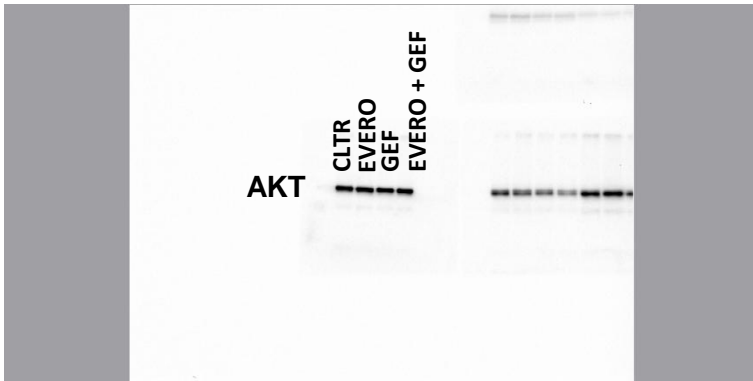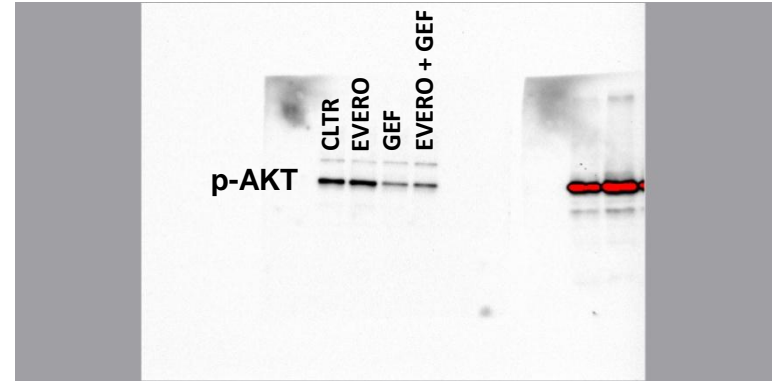

**Full-length blots – AKT and phospho-AKT – Figure 3**

**CAL-51**

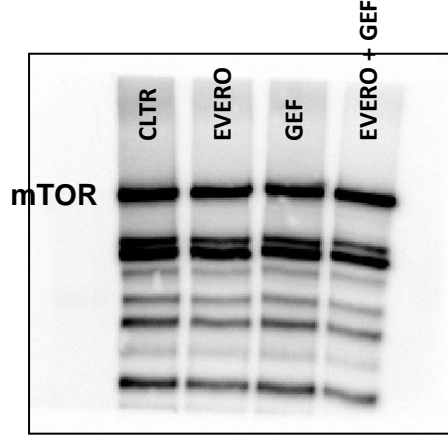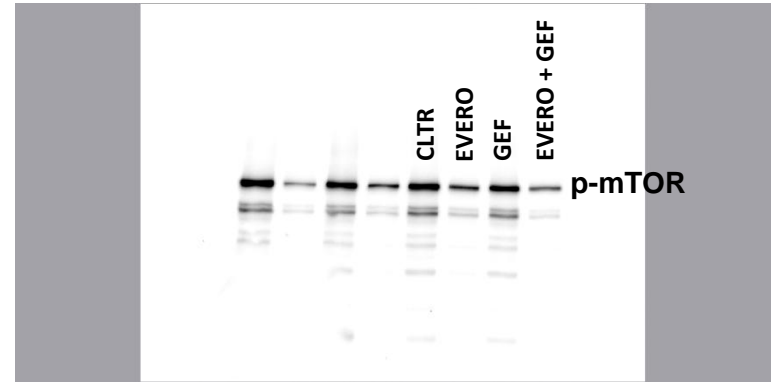

**HCC-1937**

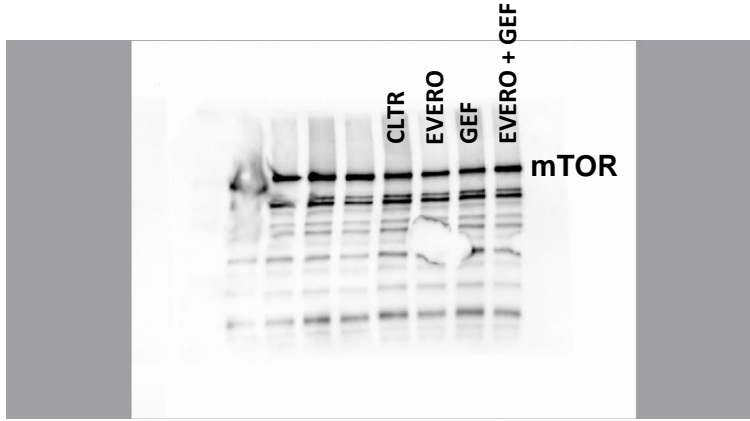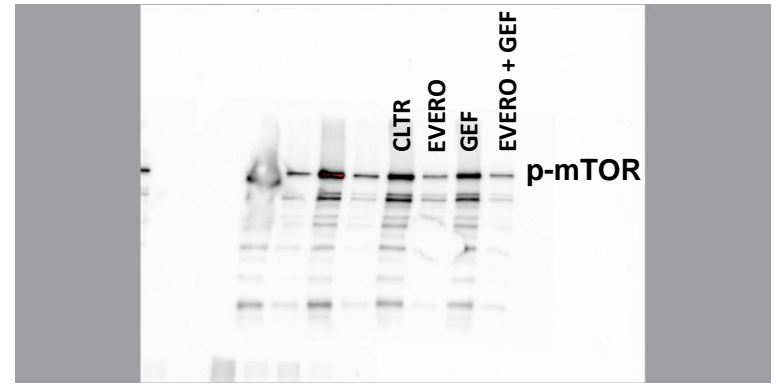

**SUM-1315**

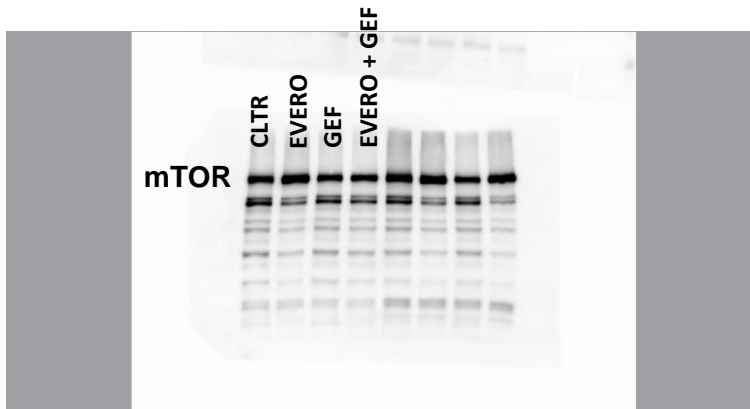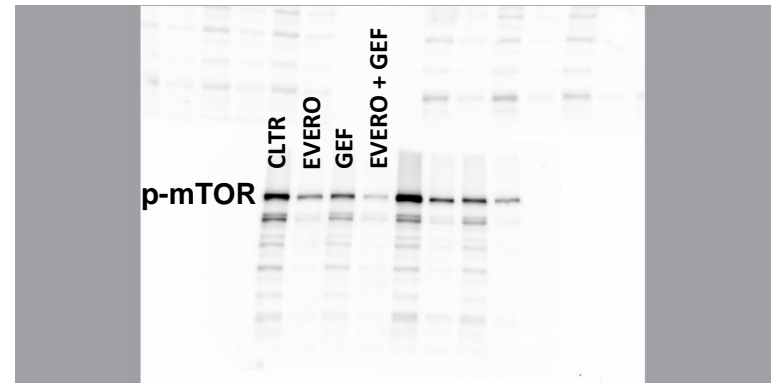

**Full-length blots – mTOR and phospho-mTOR – Figure 3**

**CAL-51**

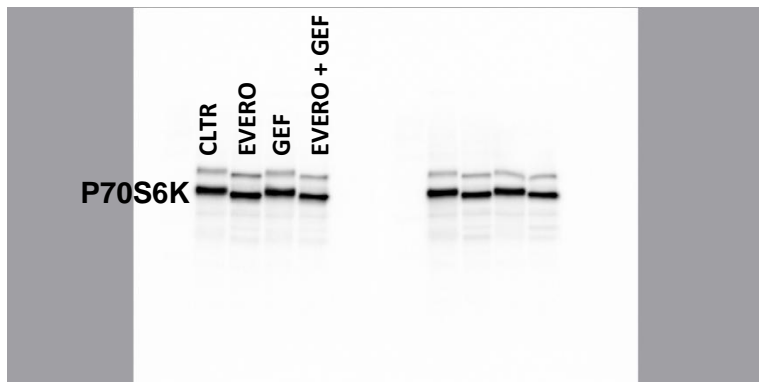

p-P70S6K

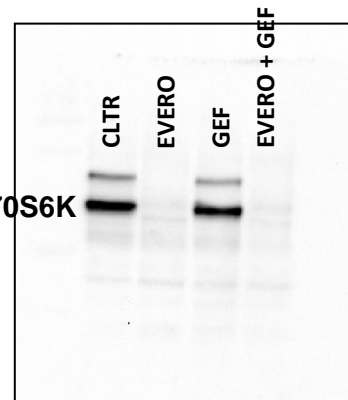

**HCC-1937**

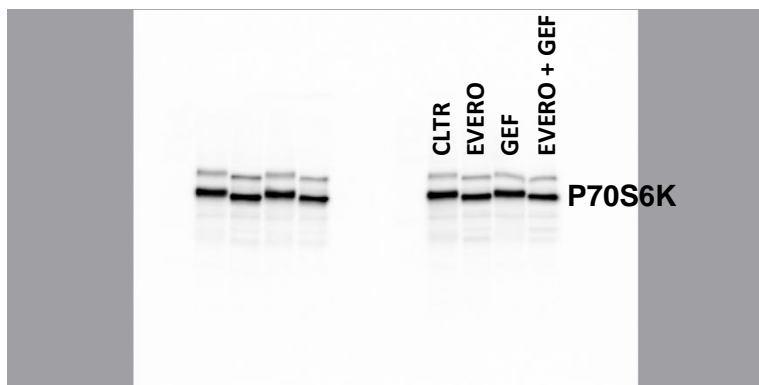

p-P70S6K

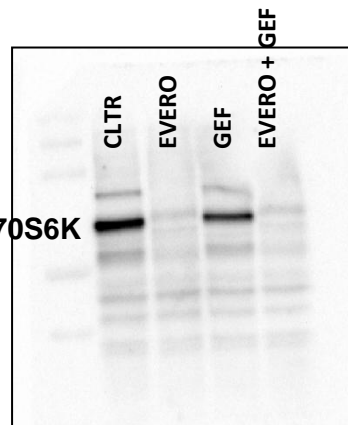

**SUM-1315**

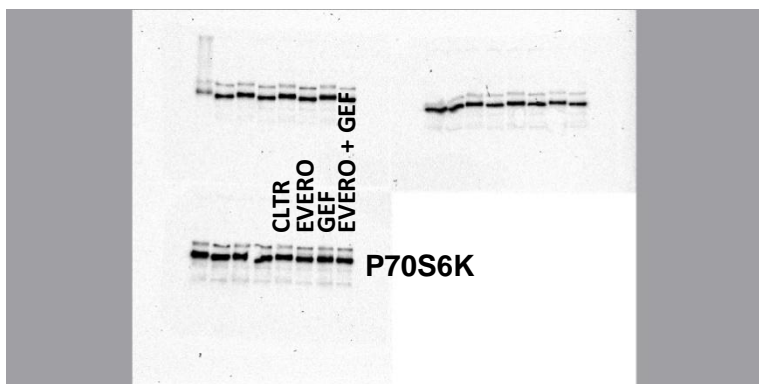

p-P70S6K

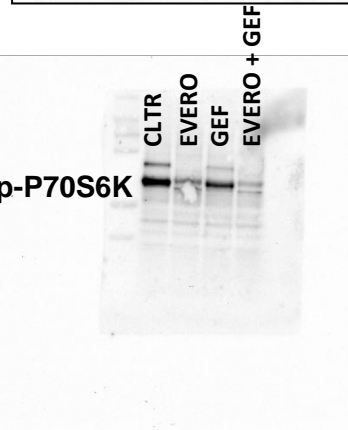

**Full-length blots – P70S6K and phospho-P70S6K – Figure 3**

**CAL-51**

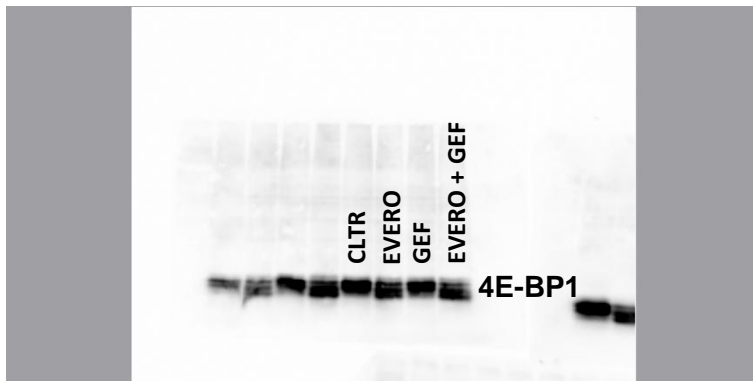

**HCC-1937**

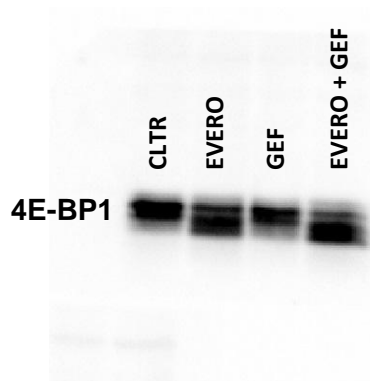

**SUM-1315**

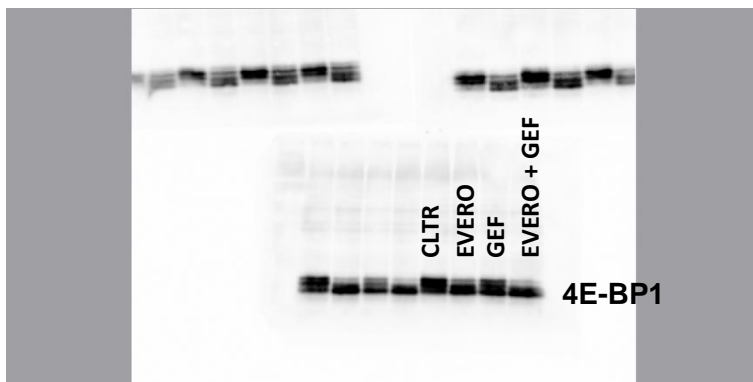

**phospho-4E-BP1**

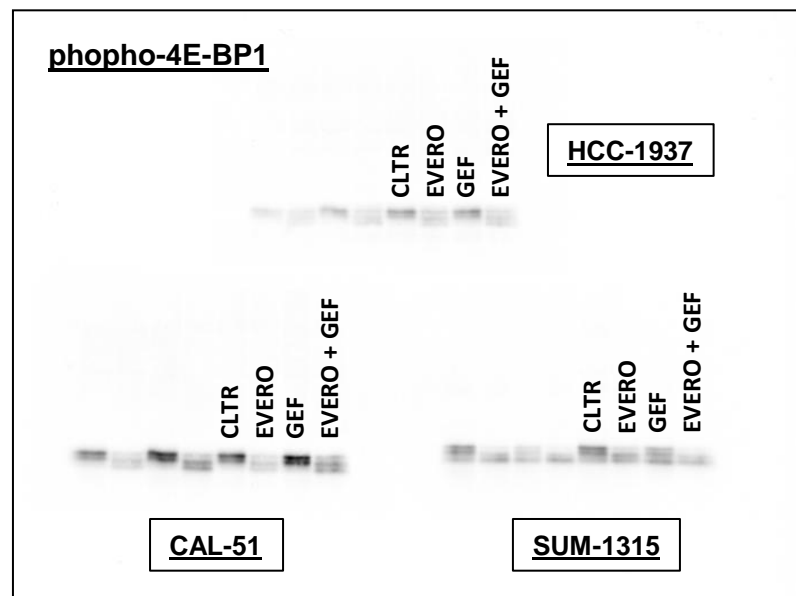

**Full-length blots – 4E-BP1 and phospho-4E-BP1 – Figure 3**

**CAL-51**

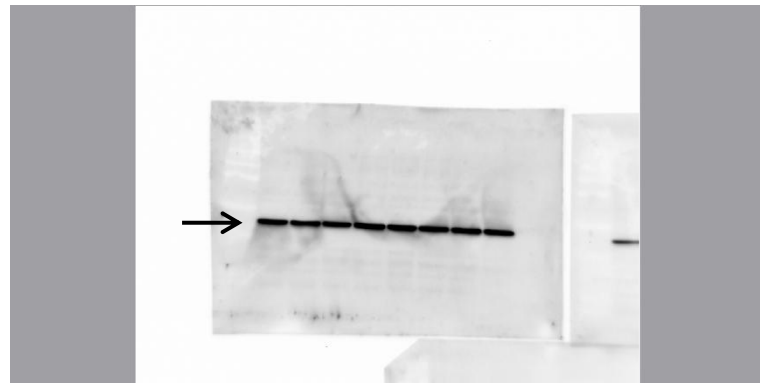

**HCC-1937**

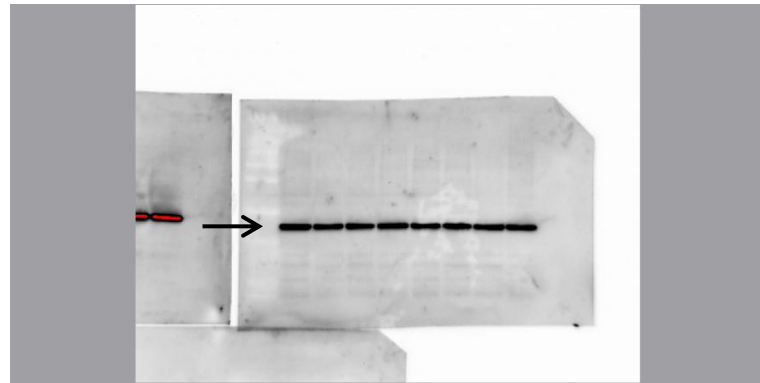

**SUM-1315**

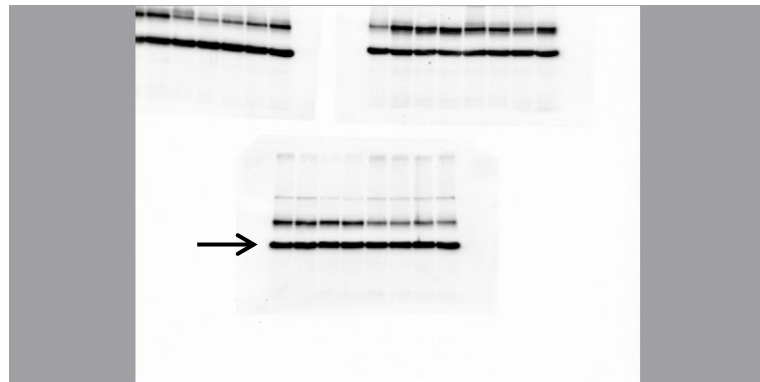

**Full-length blots – Actin – Figure 3**

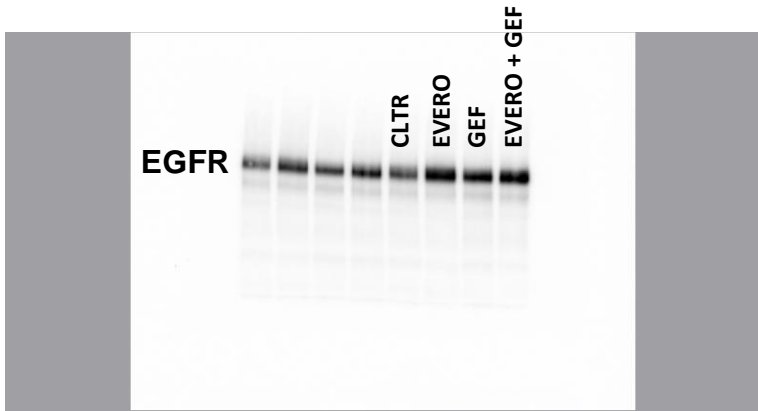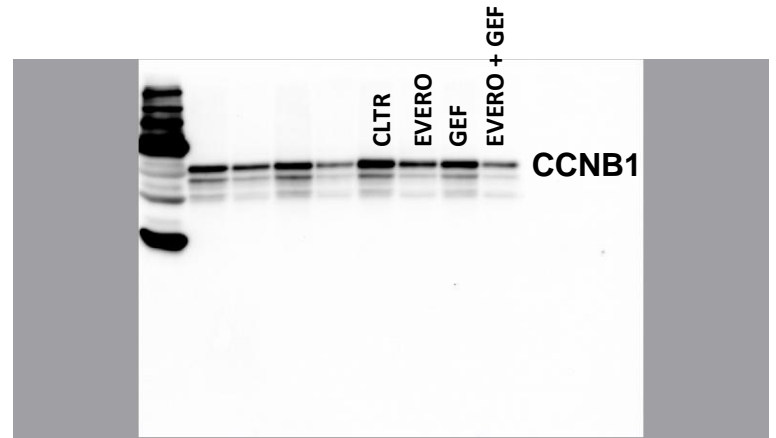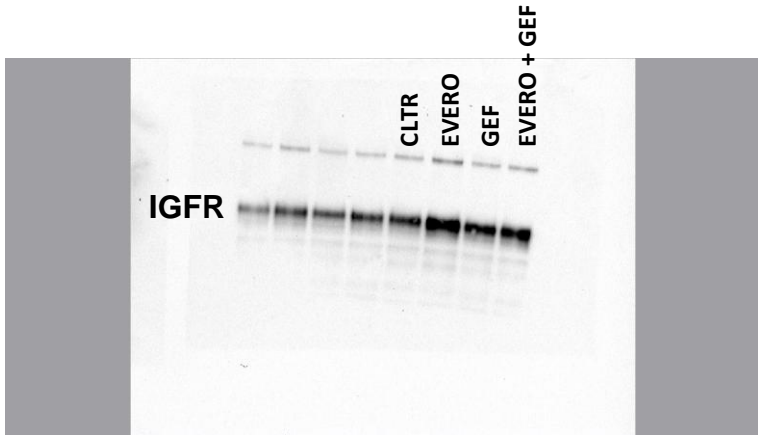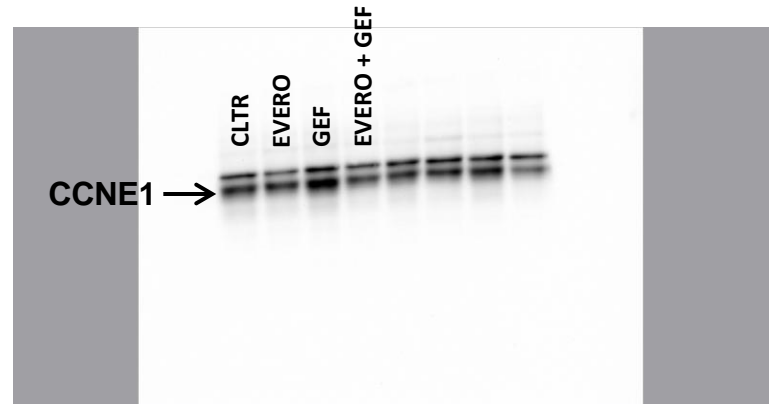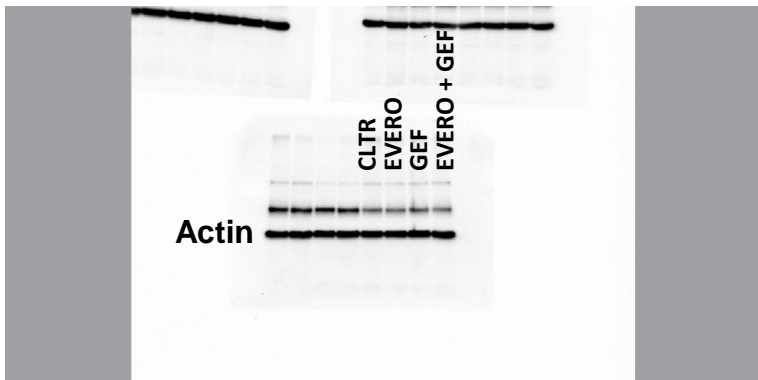

Full-length blots of Figure 5
